# Supplementary material
Source: publisher figshare collection journal article supplement (https://sage.figshare.com/ndownloader/files/17459540)

**Impact of Insertion Technique and Iliac Artery Anatomy on Fenestrated Endovascular Aneurysm Repair** Sean A. Crawford et al. *J Endovasc Ther.* 2019;26(6).

**Supplementary Figure S1.** Representative stress-stretch curves for polyvinyl alcohol cryogel samples prepared with initial polymer concentrations of 10%, 15%, or 20% and subjected to (A) 2, (B) 4, or (C) 6 freeze-thaw cycles. (D) Summarized Young moduli with respect to number of freeze-thaw cycles and polymer concentration as calculated from the physiologic region of the stress-strain curves.

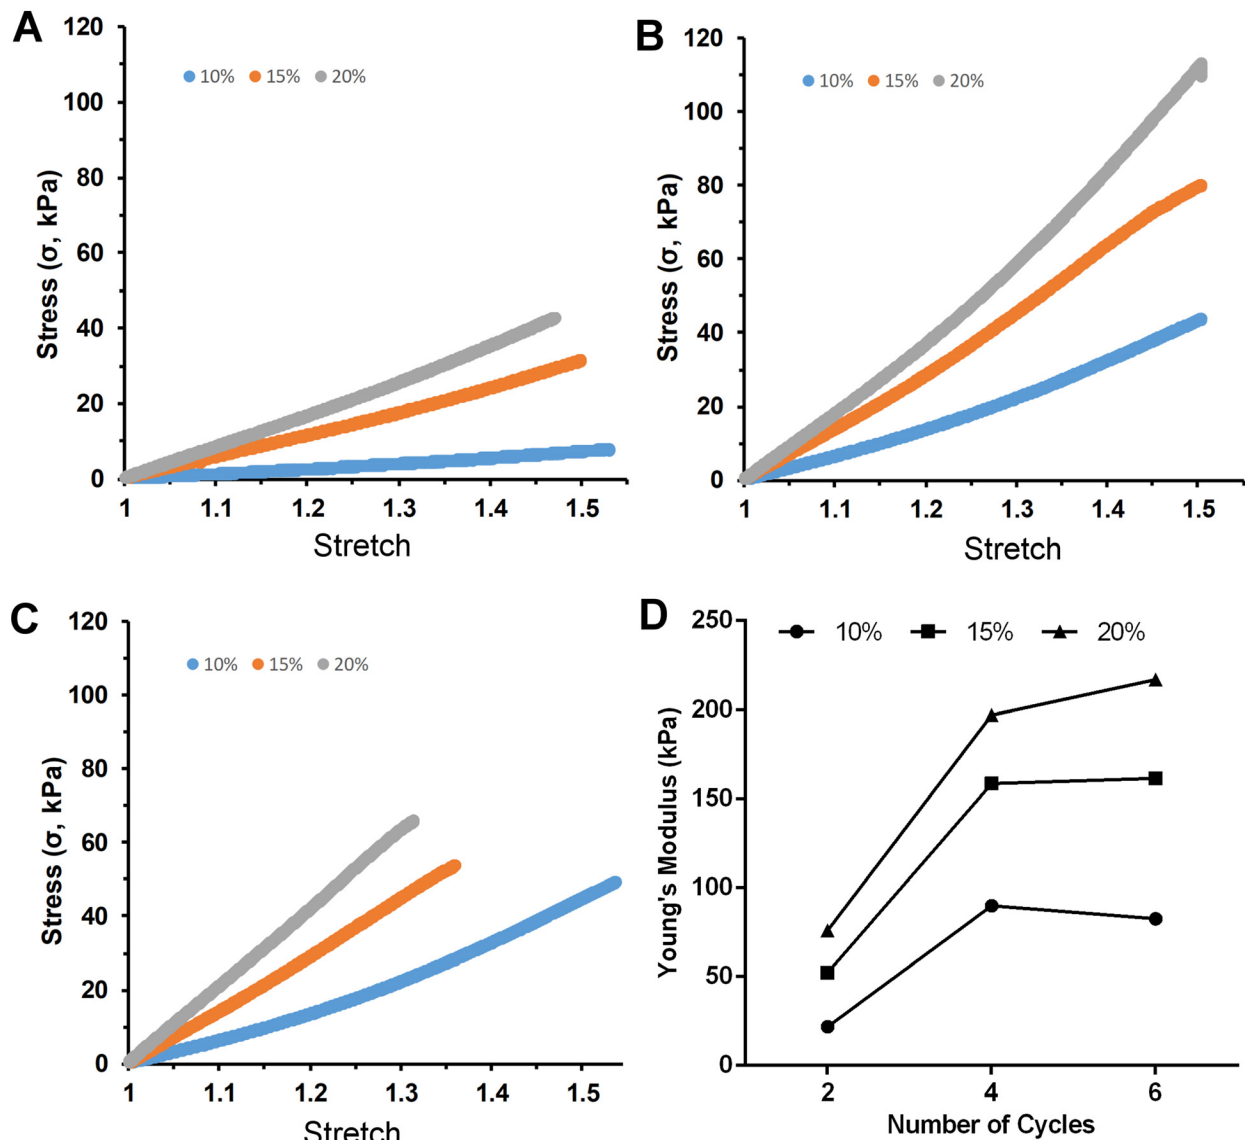

Supplement: Supplementary file 1 [file 17459540]
